# Supplementary material
Source: PubMed Central journal article supplement (PMC10230623)

● Influenza first    ■ Booster first    ▲ Combination    ▼ Booster only

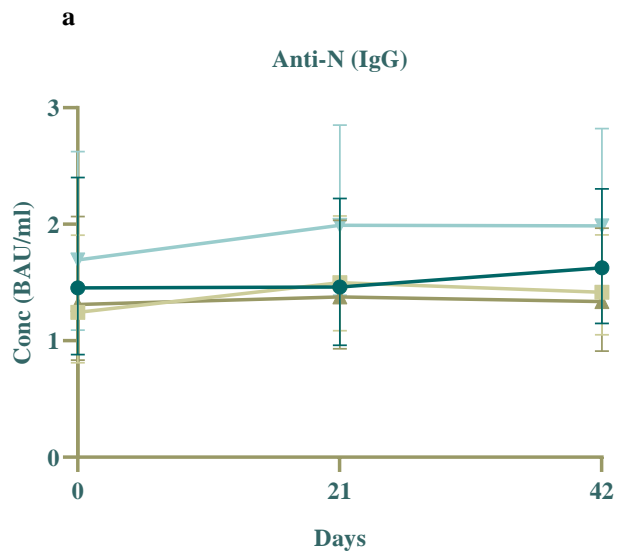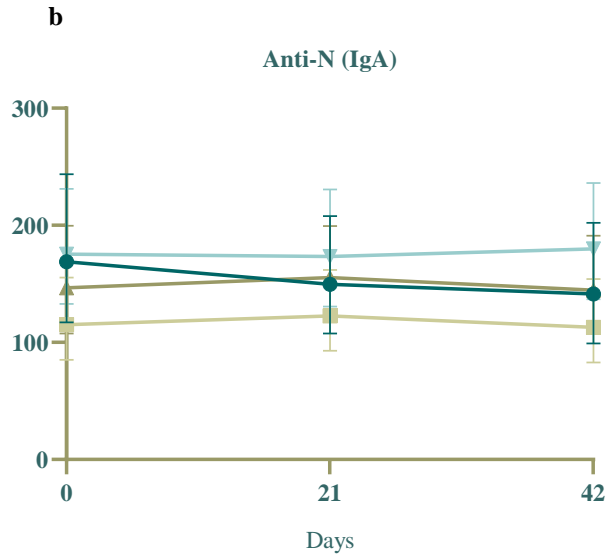

Supplement: mmc5.pdf [file mmc5.pdf]
