# Supplementary material
Source: PubMed Central journal article supplement (PMC10230623)

● Influenza first

■ Booster first

▲ Combination

▼ Booster only

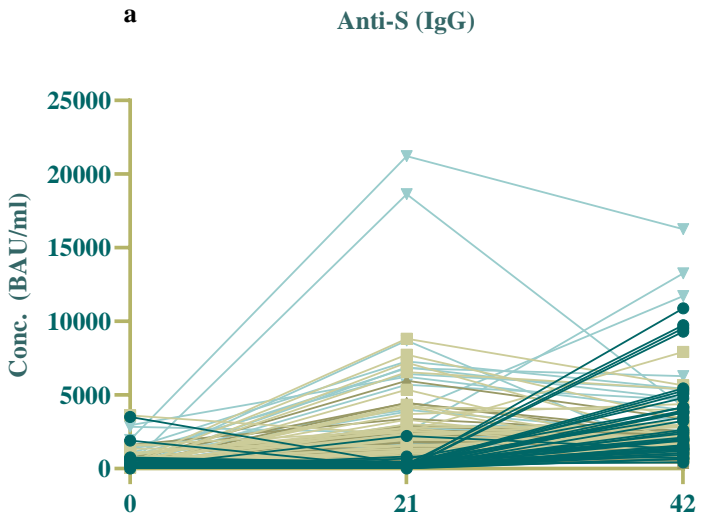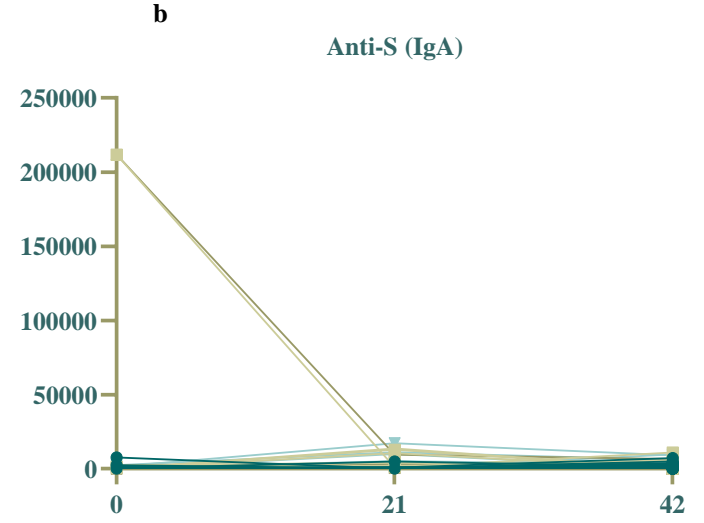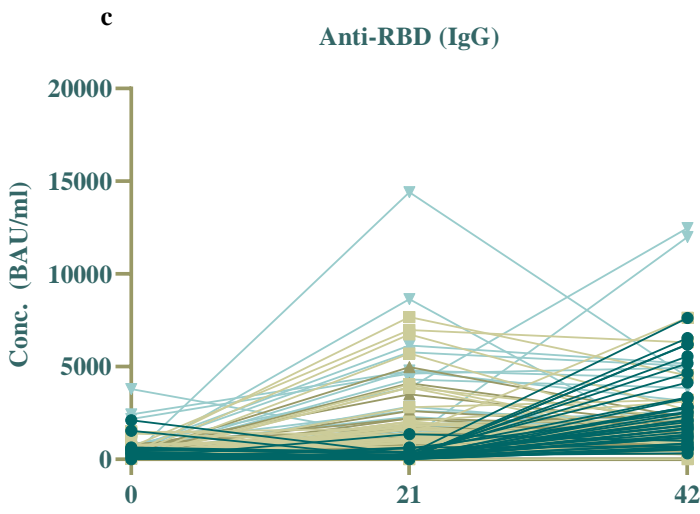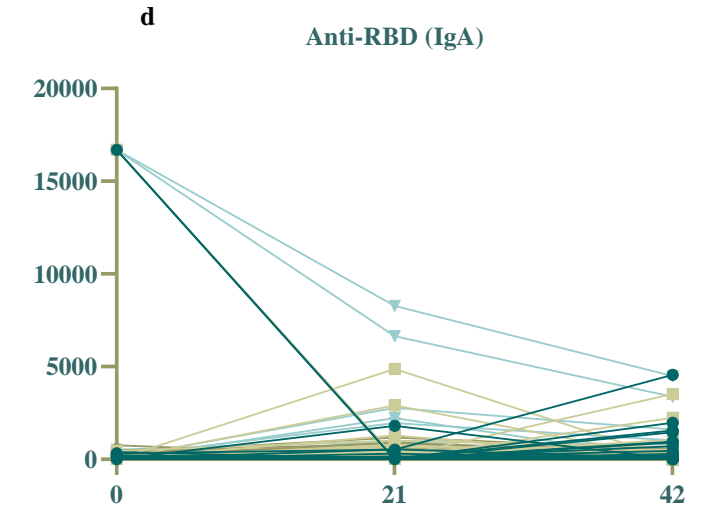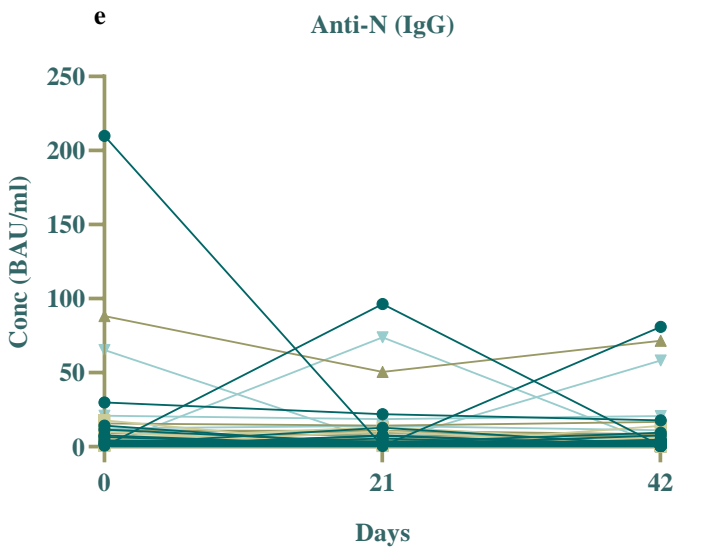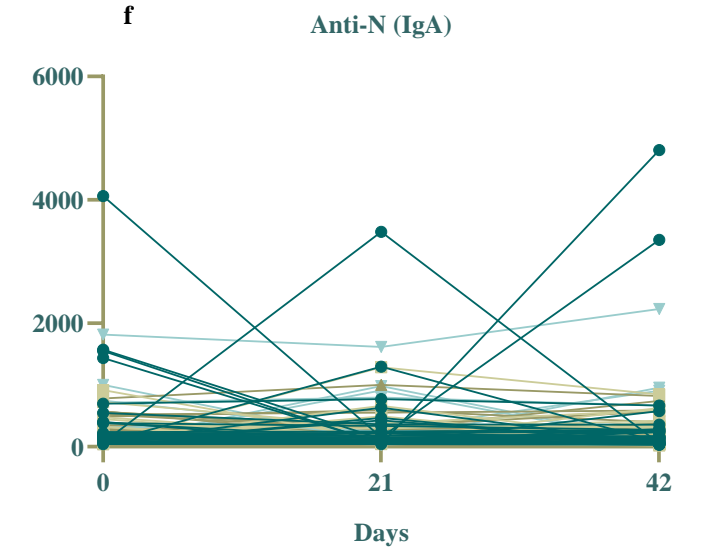

Supplement: mmc6.pdf [file mmc6.pdf]
