# Supplementary material
Source: PubMed Central journal article supplement (PMC10230623)

● Influenza first    
 ■ Booster first    
 ▲ Combination    
 ▼ Booster only

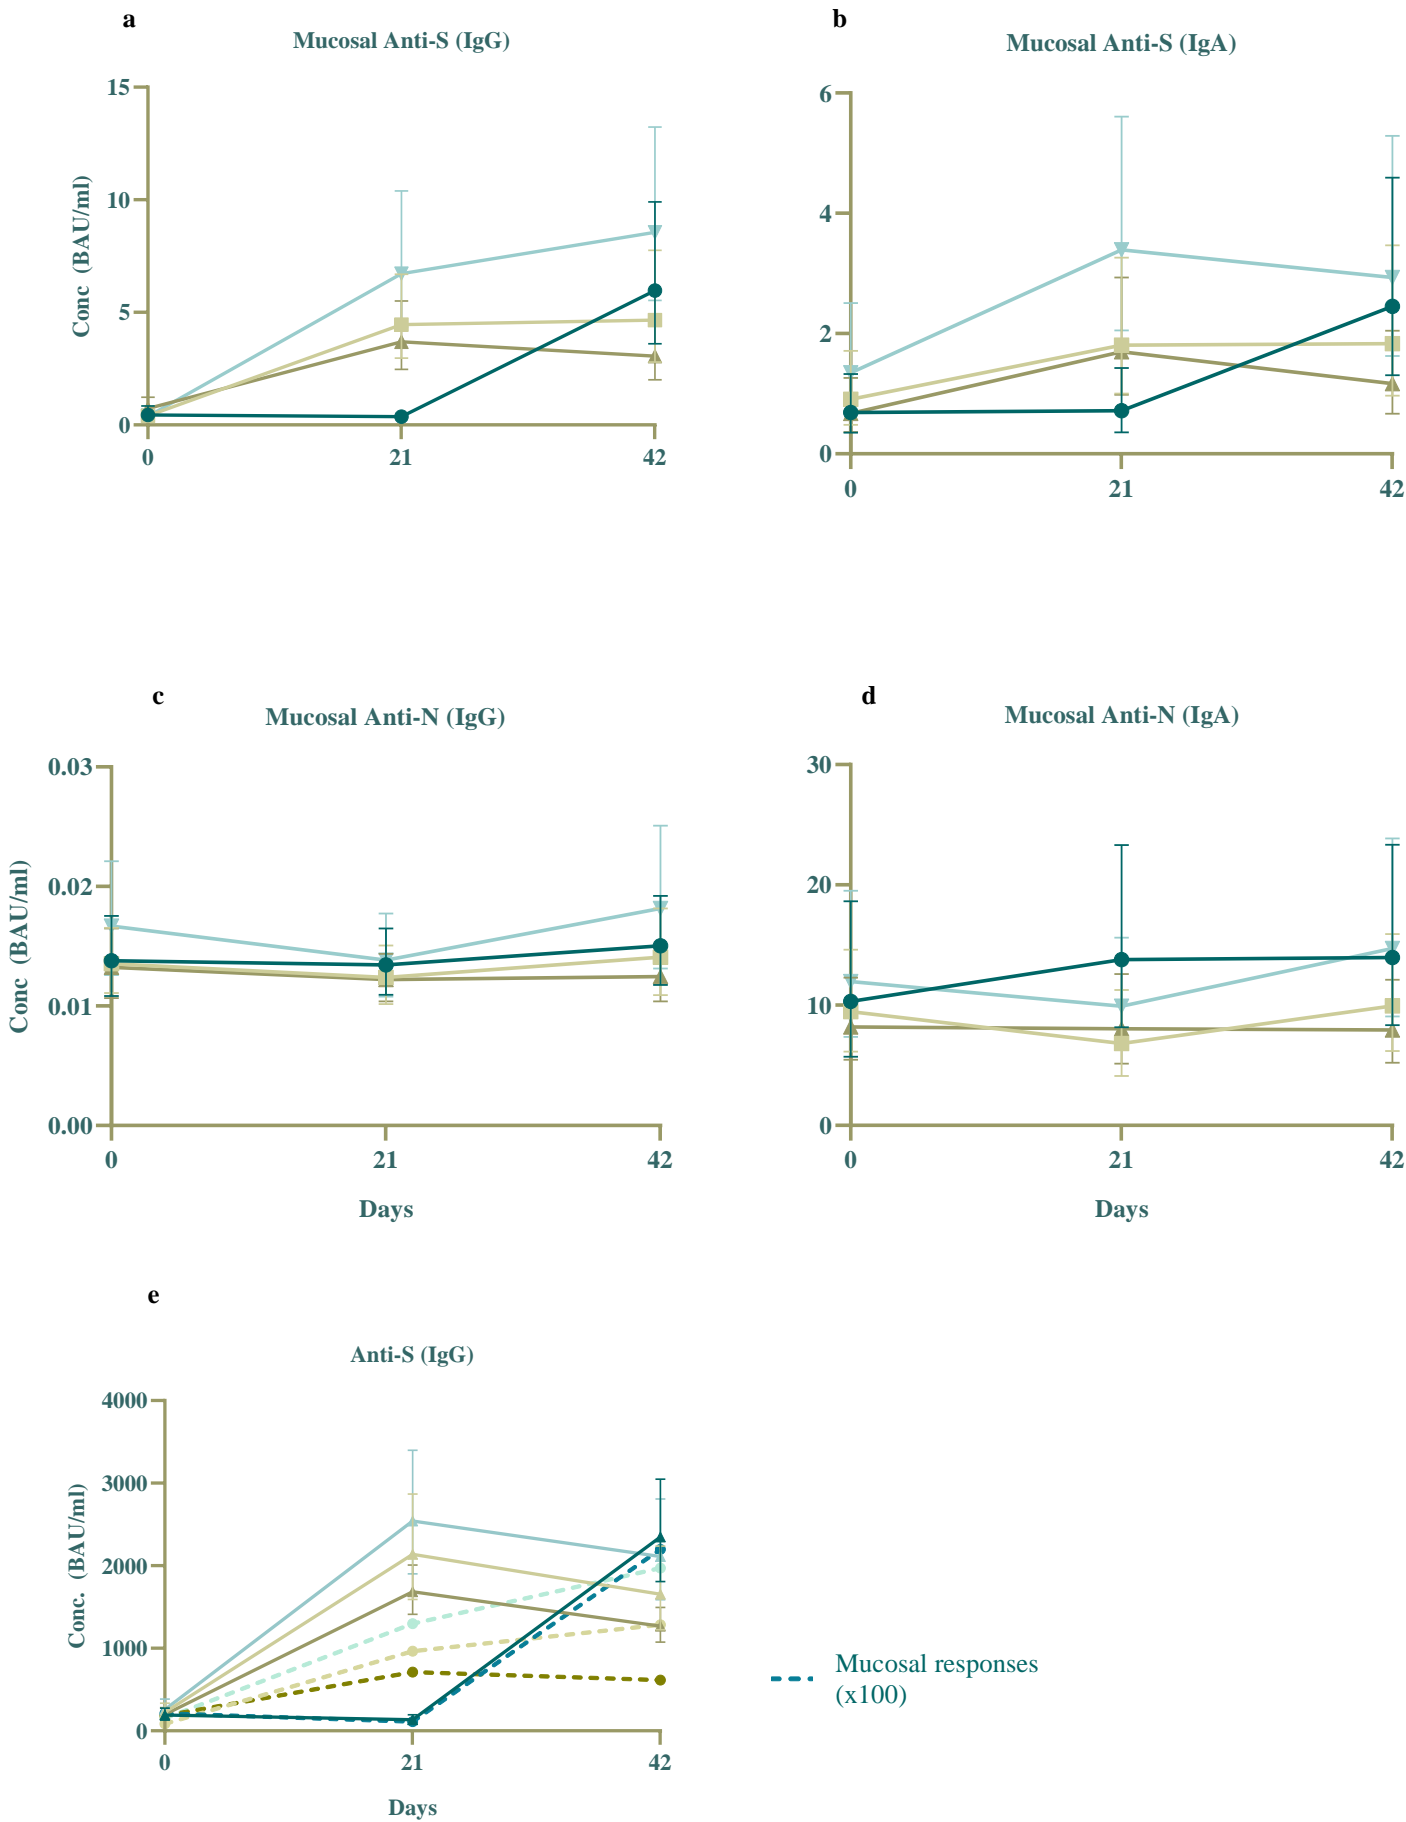

Supplement: mmc7.pdf [file mmc7.pdf]
