# Supplementary material
Source: PubMed Central journal article supplement (PMC10230623)

● Influenza first    
 ■ Booster first    
 ▲ Combination    
 ▼ Booster only

**a**

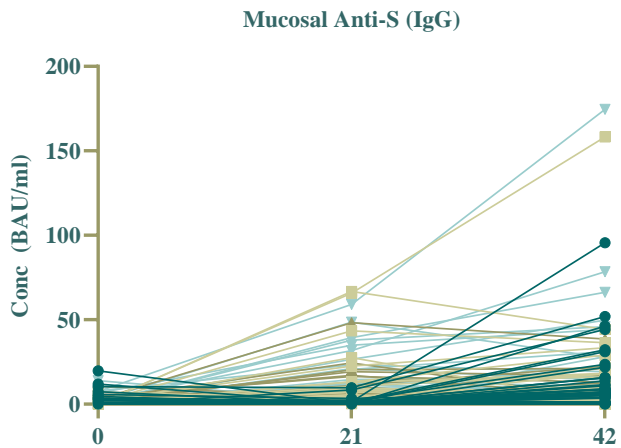

**b**

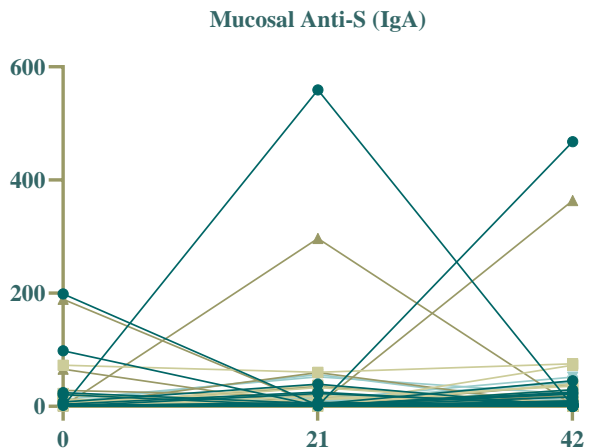

**c**

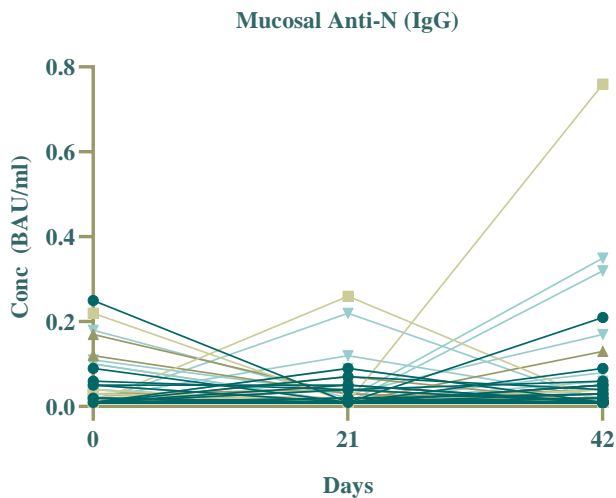

**d**

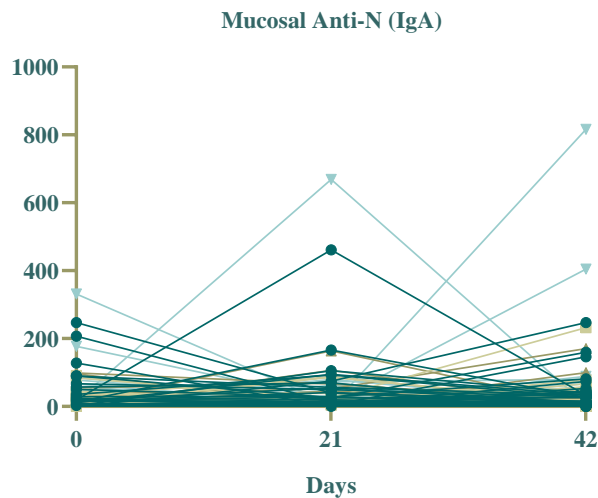

Supplement: mmc8.pdf [file mmc8.pdf]
